# Supplementary material
Source: publisher figshare collection journal article supplement (https://tandf.figshare.com/ndownloader/files/15169256)

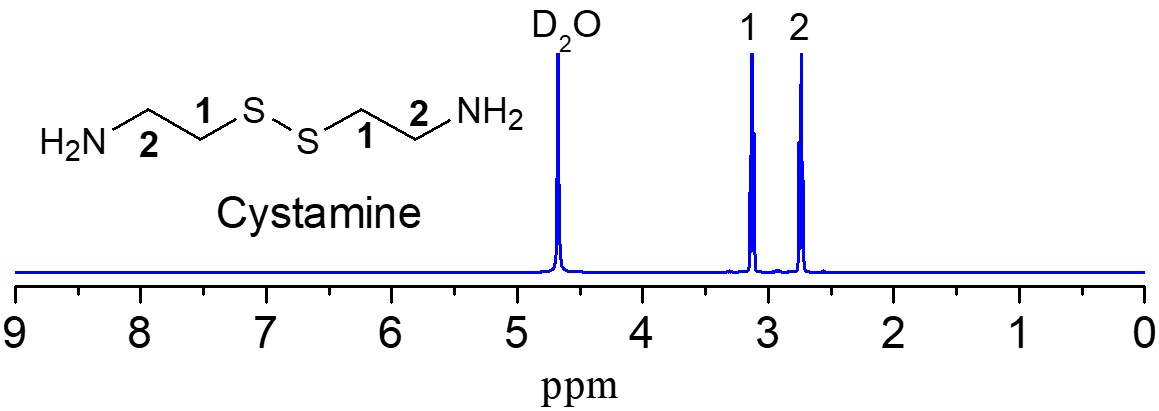


Figure 1S. 1H NMR spectra of cystamine. D2O was used as the solvent.

Graphical Abstracts


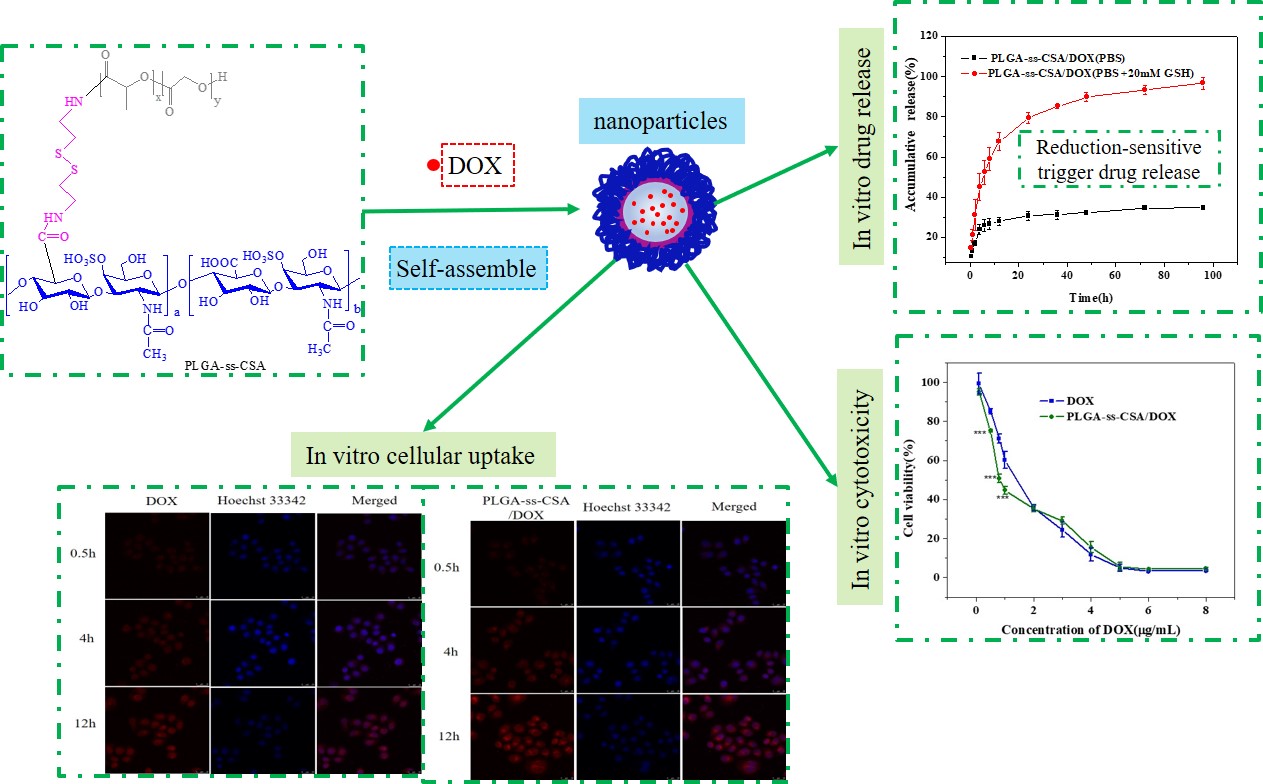

Supplement: Supplementary file 1 [file 15169256]
